# Supplementary material for: Effectiveness of Canine Hip Dysplasia and Elbow Dysplasia Improvement Programs in Six UK Pedigree Breeds
Source: Front Vet Sci. 2020 Jan 15;6:490. doi: 10.3389/fvets.2019.00490 (PMC6974481; doi:10.3389/fvets.2019.00490)
Supplement: Supplementary Table 1 — Hip score statistics of individuals born per year by breed. [file Table_1.XLSX]

## Sheet: Lab
yob	nborn	nscored	mode	mean	sd	25pc	50pc	75pc		prop scored		EBVs
1990	24246	1646	8	15.988	14.602	8	11	17		0.0678875		30.73
1991	23900	2174	8	16.789	14.884	8	12	18		0.0909623		29.475
1992	24057	2316	10	15.937	14.343	8	11	16		0.0962714		28.058
1993	25176	2580	10	15.489	13.683	8	11	16		0.102479		26.972
1994	30212	3055	10	16.246	14.766	9	11	17		0.101119		25.581
1995	32684	3153	10	15.469	13.615	9	11	15		0.0964692		24.026
1996	34827	3220	10	14.775	13.058	8	11	15		0.092457		22.066
1997	35508	3168	10	14.337	12.912	8	10	14		0.0892193		20.375
1998	34992	3042	8	14.034	12.625	8	10	14		0.0869342		18.614
1999	33885	3102	9	13.579	11.994	8	10	14		0.0915449		17.003
2000	33091	3303	9	14.012	12.985	8	10	14		0.0998157		16.905
2001	34079	3487	9	13.794	12.957	8	10	13		0.102321		15.476
2002	36585	3862	8	13.155	12.208	8	10	13		0.105562		14.143
2003	41771	4239	9	12.946	12.144	7	10	13		0.101482		12.693
2004	45273	4168	8	12.439	11.912	7	9	12		0.0920637		11.497
2005	45732	3930	8	12.077	11.332	7	9	12		0.0859355		10.792
2006	46002	3700	8	11.809	11.074	7	9	12		0.0804313		8.9716
2007	45383	3521	8	11	9.9731	7	9	11		0.0775841		7.9558
2008	44485	3260	8	10.936	9.7228	7	9	11		0.0732831		6.8336
2009	41528	3091	8	10.657	9.7499	7	9	11		0.0744317		5.0829
2010	43446	3274	8	10.619	9.0332	7	9	11		0.0753579		3.6207
2011	39498	2925	8	11.023	10.395	7	9	11		0.0740544		2.9518
2012	36347	2679	9	10.742	9.5339	7	9	11		0.0737062		1.2407
2013	35128	2766	8	10.755	9.3856	7	9	11		0.0787406		0.83925
2014	34142	2814	8	10.96	10.434	7	9	11		0.0824205		-0.84101
2015	33235	2716	8	10.149	8.4905	7	9	11		0.0817211		-1.2156
2016	33765	2391	8	10.327	8.8641	7	9	11		0.070813		-2.9115
2017	35702	1801	8	9.543	6.6854	7	9	11		0.0504454		-4.25
2018	36048	129	7	9.6279	5.5524	7	9	11		0.00357856		-5.8688

## Sheet: GR
yob	nborn	nscored	mode	mean	sd	25pc	50pc	75pc		prop scored		EBVs
1990	14871	1041	12	20.068	15.2	10	14	23.25		0.070002		33.534
1991	15325	1340	10	19.316	14.602	10	14	23		0.0874388		31.301
1992	14110	1233	13	20.552	15.449	11	15	25		0.0873848		31.37
1993	14627	1394	10	19.256	14.072	10	14	22		0.0953032		28.967
1994	14676	1421	12	18.457	14.117	10	13	20		0.0968247		26.673
1995	15708	1475	12	18.485	13.709	10	13	21		0.0939012		25.368
1996	16619	1495	10	17.605	13.423	10	13	19		0.0899573		23.503
1997	15400	1317	10	17.497	13.068	10	13	20		0.0855195		22.279
1998	14220	1224	10	16.218	12.476	9	12	16		0.0860759		19.844
1999	12615	1055	10	16.758	13.159	9	12	18		0.0836306		18.647
2000	11837	1108	10	17.066	13.326	9	12	19		0.0936048		17.928
2001	10083	986	10	16.508	12.5	9	12	18		0.0977884		15.781
2002	10529	1093	10	16.888	13.346	9	12	18		0.103809		14.201
2003	10601	1144	10	15.244	11.912	9	11	15		0.107914		12.072
2004	10531	1075	10	15.423	11.53	9	12	17		0.10208		12.141
2005	10105	1024	10	15.095	11.84	9	11	15		0.101336		11.005
2006	9284	876	10	14.766	11.931	9	11	14.5		0.0943559		9.0032
2007	9858	950	10	13.6	10.124	9	11	14		0.0963684		7.3112
2008	8721	835	9	13.884	10.841	8	11	14		0.0957459		5.4335
2009	8112	822	9	13.678	10.434	8	10	13		0.101331		4.2992
2010	7857	799	10	13.238	10.201	8	10	13		0.101693		3.0697
2011	8042	857	9	13.799	10.786	8	10	14		0.106566		1.8111
2012	7201	743	10	12.988	9.618	9	11	13		0.10318		1.2591
2013	7155	744	10	13.254	10.142	8	10	13		0.103983		-0.55761
2014	7050	786	9	12.317	8.0849	8	10	13		0.111489		-1.3609
2015	7263	802	8	12.332	8.5286	8	10	13		0.110423		-1.7059
2016	7188	644	10	12.944	8.9644	9	11	13		0.0895938		-1.6936
2017	8102	496	9	12.383	8.0322	8	10	13		0.0612195		-2.1738
2018	7719	28	8	14.25	11.536	8	10	14.5		0.00362741		-2.79

## Sheet: GSD
yob	nborn	nscored	mode	mean	sd	25pc	50pc	75pc		prop scored		EBVs
1990	17680	965	11	19.397	17.473	9	13	22		0.0545814		20.953
1991	17427	1313	14	18.761	16.33	9	13	21		0.0753429		20.126
1992	17254	1408	10	19.696	16.279	10	14	23		0.0816043		20.295
1993	20151	1771	10	19.076	16.604	10	13	21		0.0878865		19.035
1994	22674	1748	11	19.031	16.075	10	13	21		0.0770927		19.041
1995	24197	1716	10	19.361	16.452	10	13	21		0.0709179		18.373
1996	25576	1545	10	18.186	16.128	9	12	19		0.0604082		17.43
1997	23649	1247	10	18.761	16.483	10	12	20		0.0527295		17.1
1998	20462	1189	10	18.186	16.45	9	12	18		0.0581077		15.715
1999	17816	1078	9	16.423	14.542	9	11	16		0.0605074		14.019
2000	16271	1005	11	17.463	15.735	9	11	18		0.0617663		13.097
2001	14195	979	9	17.273	15.577	9	12	17		0.0689679		13.038
2002	14159	1098	10	17.321	15.56	9	12	17		0.0775478		12.151
2003	14598	1135	11	17.533	15.652	9	12	18		0.0777504		11.5
2004	13789	1059	9	16.276	14.696	9	11	16		0.0768003		9.6115
2005	13146	1058	9	16.151	14.305	9	11	16		0.0804808		8.6941
2006	12649	1039	10	16.44	15.545	9	11	16		0.0821409		7.4323
2007	12013	865	10	14.934	13.599	9	11	14		0.0720053		5.5378
2008	11671	911	9	15.336	13.349	9	11	15		0.0780567		3.958
2009	10244	878	9	14.6	12.748	9	11	14		0.0857087		1.8089
2010	10117	823	11	15.781	13.517	9	11	15.75		0.0813482		2.4977
2011	9795	797	10	14.346	11.753	9	11	14		0.081368		1.7785
2012	8346	679	10	14.943	13.057	9	11	14		0.0813563		0.88839
2013	7945	642	12	14.69	12.116	9	11	14		0.0808055		0.28782
2014	7898	706	9	14.212	12.098	9	11	14		0.0893897		-0.9478
2015	7941	595	10	13.839	11.194	9	11	14		0.0749276		-0.5721
2016	7673	486	10	14.006	11.642	9	11	14		0.063339		-1.3194
2017	7432	315	10	13.965	10.974	9	11	14		0.0423843		-2.6329
2018	6965	16	9	13.75	8.5206	9	11	13		0.0022972		-3.7923

## Sheet: Rott
yob	nborn	nscored	mode	mean	sd	25pc	50pc	75pc		prop scored		EBVs
1990	2642	162	7	11.815	9.3691	7	9	13		0.0613172		23.421
1991	2350	215	8	12.907	11.366	7	9	14		0.0914894		21.363
1992	1987	195	8	12.538	12.237	7	9	13		0.0981379		17.803
1993	2508	267	8	12.367	10.459	7	9	12		0.106459		18.691
1994	3133	437	8	12.314	10.98	7	9	12		0.139483		17.306
1995	3609	441	8	11.501	9.27	7	9	12		0.122195		14.754
1996	4252	463	6	11.302	9.6371	7	9	12		0.10889		13.698
1997	4424	479	8	11.065	10.807	7	8	11		0.108273		12.903
1998	5159	439	8	11.103	8.7911	7	8	12		0.085094		13.665
1999	5300	449	8	11.339	8.9583	7	8	12		0.084717		12.204
2000	5029	469	6	10.823	7.9351	7	8	11		0.0932591		11.788
2001	5609	426	6	11.331	8.9611	7	9	12		0.0759494		10.65
2002	5861	520	8	10.64	8.0635	7	8	11		0.0887221		10.103
2003	6411	505	6	11.436	9.1485	7	9	12		0.0787709		10.265
2004	6757	457	6	11.151	10.26	7	8	11		0.0676336		8.5495
2005	6880	401	6	10.84	8.4867	7	8	11		0.0582849		9.1173
2006	6253	282	6	10.411	8.9212	6	8	11		0.0450984		7.7323
2007	3971	195	6	9.8923	10.759	6	7	10		0.049106		6.3104
2008	2533	160	8	8.8	6.5988	6	8	9		0.0631662		6.4121
2009	2141	192	6	8.9115	6.826	6	7	10		0.0896777		3.6332
2010	1860	152	6	8.7961	5.2353	6	7	10		0.0817204		2.9922
2011	2017	184	6	9.1033	7.0969	6	7	10		0.0912246		0.59401
2012	1532	132	8	9.947	9.0024	6	8	10.5		0.0861619		1.5867
2013	1462	153	6	9.5229	7.556	6	7	10		0.104651		0.73244
2014	1573	174	6	8.9598	8.1158	6	7	10		0.110617		-1.6363
2015	1448	162	6	9.5185	9.9871	6	7	9		0.111878		-2.5704
2016	1493	142	6	8.5634	8.7458	6	7	9		0.0951105		-3.9208
2017	1700	87	8	8.5862	6.1371	6	8	9.75		0.0511765		-0.94528
2018	1626	4	6	7.75	2.0616	6	7.5	9.5		0.00246002		-3.3585

## Sheet: BMD
yob	nborn	nscored	mode	mean	sd	25pc	50pc	75pc		prop scored		EBVs
1990	721	143	7	18.217	17.184	7	12	21		0.198336		21.471
1991	621	153	6	15.863	11.703	8	11	21.25		0.246377		18.249
1992	697	170	12	17.294	14.032	8	12	21		0.243902		17.993
1993	694	167	8	17.904	16.675	9	12	20		0.240634		15.098
1994	706	187	9	16.941	16.657	8	11	18		0.264873		13.178
1995	883	209	10	17.005	13.894	9	12	19.25		0.236693		13.895
1996	701	189	11	15.635	11.748	9	12	18		0.269615		10.944
1997	929	208	8	15.159	14.363	8	10	14.5		0.223897		10.467
1998	824	165	7	16.242	15.412	7	10	17		0.200243		12.419
1999	822	167	8	13.246	8.41	8	10	16		0.203163		8.787
2000	807	172	6	14.785	13.241	7	10	17		0.213135		10.891
2001	650	165	8	13.509	10.888	8	10	14		0.253846		8.6001
2002	828	196	6	13.898	12.33	7	9	15		0.236715		8.1934
2003	869	178	7	14.258	12.254	7	10	15		0.204833		10.121
2004	814	179	6	12.648	10.391	7	9	14		0.219902		6.9411
2005	821	163	8	11.472	6.8244	8	10	13		0.198538		3.1209
2006	734	152	8	12.967	11.369	8	9	13		0.207084		6.6936
2007	660	130	8	12.115	8.0883	7	10	13		0.19697		3.2015
2008	688	121	8	12.917	10.337	7	10	14		0.175872		4.1256
2009	737	145	7	11.634	8.6432	7	9	12.25		0.196744		1.9991
2010	624	110	6	11.536	8.1721	7	9	13		0.176282		2.8593
2011	728	154	8	12.701	12.789	7	8.5	12		0.211538		1.7094
2012	498	98	6	11.969	10.33	6	9	13		0.196787		2.1048
2013	740	138	6	11.319	9.9759	6	9	12		0.186486		-0.53454
2014	658	119	6	11.597	10.703	7	9	11.75		0.180851		-1.0869
2015	489	100	8	10.78	5.9807	7.5	9.5	12		0.204499		-1.1584
2016	654	101	6	11.455	7.7389	7	9	13		0.154434		-2.0555
2017	528	60	8	10.867	8.1334	8	9	10		0.113636		-3.4064
2018	551	1	30	30	0	30	30	30		0.00181488		-1.355

## Sheet: Newf
yob	nborn	nscored	mode	mean	sd	25pc	50pc	75pc		prop scored		EBVs
1990	638	121	20	34.041	26.219	14	25	54		0.189655		26.47
1991	622	135	6	31.489	23.45	11	25	51		0.217042		23.887
1992	716	168	11	26.899	20.445	12	19	38.5		0.234637		19.31
1993	653	149	7	22.812	18.809	9	16	30.5		0.228178		19.753
1994	862	184	8	26.223	21.283	11	18	35.5		0.213457		19.567
1995	765	190	9	24.063	20.579	9	15.5	33		0.248366		14.358
1996	1003	209	8	27.325	21.645	11	20	36		0.208375		13.937
1997	1123	224	10	24.772	21.471	9	16	34.5		0.199466		12.16
1998	1056	215	9	23.688	20.25	9	16	33.75		0.203598		12.808
1999	872	148	9	21.818	19.324	9	14	26		0.169725		9.5128
2000	1095	199	6	22.523	20.983	9	13	28.75		0.181735		7.7192
2001	898	140	10	23.843	20.243	9	14	33		0.155902		8.4308
2002	964	213	7	22.009	19.286	9	14	28.25		0.220954		5.5622
2003	975	166	10	22.614	20.971	9	12	31		0.170256		7.1247
2004	931	154	10	22.74	20.509	9	13	28		0.165414		4.7973
2005	1056	192	9	20.594	18.592	9	12	27		0.181818		2.6436
2006	1117	157	6	21.949	19.736	9	14	27.25		0.140555		4.2712
2007	997	140	7	18.521	16.774	8	12	21		0.140421		0.32884
2008	1078	153	9	16.928	15.382	8	10	19.25		0.141929		-0.62269
2009	883	134	6	17.955	19.122	8	11	17		0.151755		-1.3679
2010	1019	147	8	16.252	16.442	8	10	15		0.144259		-1.596
2011	910	144	6	14.514	13.261	7	11	15		0.158242		-0.83774
2012	873	137	6	16.168	16.787	7	10	16.25		0.15693		-0.21164
2013	981	115	10	14.365	14.136	7	10	12.75		0.117227		1.7434
2014	950	138	6	15.043	14.474	7	10	16		0.145263		0.74377
2015	871	98	8	15.306	14.591	8	10	17		0.112514		1.9525
2016	863	71	6	14.127	13.503	7	10	17		0.0822711		1.9135
2017	746	48	6	11.854	9.9252	6.5	9	12.5		0.0643432		0.29925
2018	672	2	20	45	35.355	20	45	70		0.00297619		-2.9531
