# Supplementary material for: Effectiveness of Canine Hip Dysplasia and Elbow Dysplasia Improvement Programs in Six UK Pedigree Breeds
Source: Front Vet Sci. 2020 Jan 15;6:490. doi: 10.3389/fvets.2019.00490 (PMC6974481; doi:10.3389/fvets.2019.00490)
Supplement: Supplementary Table 2 — Hip score statistics of sires and dams of dogs born per year by breed. [file Table_2.XLSX]

## Sheet: Lab
yob	nunscored	nscored	propscores	mean	sd	25pc	50pc	75pc		prop scored		prop	med	75pc	mean	sd
1990	1682	226	0.11845	7.7743	10.649	4	6	8		0.118449
1991	1623	259	0.13762	9.1969	10.691	4	6	8		0.13762
1992	1529	376	0.19738	10.984	10.654	6	8	13		0.197375		0.151148	6.66667	9.66667	9.3184	10.6647
1993	1387	491	0.26145	11.02	9.8256	6	8	13		0.261448		0.198814	7.33333	11.3333	10.4003	10.3902
1994	1481	682	0.3153	11.909	11.045	6	9	14		0.315303		0.258042	8.33333	13.3333	11.3043	10.5082
1995	1473	803	0.35281	11.573	10.271	6	9	13		0.352812		0.309854	8.66667	13.3333	11.5007	10.3805
1996	1521	949	0.38421	11.505	9.1383	7	9	13		0.384211		0.350775	9	13.3333	11.6623	10.1514
1997	1492	1045	0.4119	11.063	7.8494	7	10	12		0.411904		0.382975	9.33333	12.6667	11.3803	9.08623
1998	1389	1145	0.45185	11.024	7.68	7	10	12		0.451855		0.41599	9.66667	12.3333	11.1973	8.22257
1999	1252	1173	0.48371	11.146	7.5109	8	10	13		0.483711		0.449157	10	12.3333	11.0777	7.6801
2000	1187	1167	0.49575	10.951	7.4803	8	10	12		0.495752		0.477106	10	12.3333	11.0403	7.55707
2001	1191	1253	0.51268	10.994	7.6279	8	10	12		0.512684		0.497382	10	12.3333	11.0303	7.5397
2002	1248	1320	0.51402	10.781	7.3501	7	9	12		0.514019		0.507485	9.66667	12	10.9087	7.4861
2003	1347	1455	0.51927	10.505	7.1243	7	9	12		0.519272		0.515325	9.33333	12	10.76	7.36743
2004	1342	1569	0.53899	10.273	6.5792	7	9	12		0.53899		0.524094	9	12	10.5197	7.01787
2005	1494	1624	0.52085	10.112	7.3748	7	9	11		0.520847		0.52637	9	11.6667	10.2967	7.0261
2006	1519	1646	0.52006	9.7764	6.2061	7	9	11		0.520063		0.526633	9	11.3333	10.0538	6.72003
2007	1597	1699	0.51547	9.5521	6.1426	7	9	11		0.515473		0.518794	9	11	9.8135	6.5745
2008	1633	1680	0.50709	9.5601	6.7638	7	9	11		0.507093		0.51421	9	11	9.62953	6.37083
2009	1589	1621	0.50498	9.1302	6.231	6	8	10		0.504984		0.509184	8.66667	10.6667	9.41413	6.37913
2010	1635	1663	0.50424	9.077	6.3292	6	8	10		0.504245		0.505441	8.33333	10.3333	9.25577	6.44133
2011	1563	1547	0.49743	8.755	5.5419	6	8	10		0.497428		0.502219	8	10	8.9874	6.03403
2012	1463	1475	0.50204	8.5281	5.4898	6	8	10		0.502042		0.501238	8	10	8.7867	5.78697
2013	1393	1432	0.5069	8.5098	5.4985	6	8	10		0.506903		0.502124	8	10	8.59763	5.51007
2014	1232	1323	0.51781	8.0786	4.488	6	8	10		0.517808		0.508918	8	10	8.37217	5.15877
2015	1162	1335	0.53464	8.1116	4.5887	6	8	10		0.534642		0.519784	8	10	8.23333	4.8584
2016	1083	1321	0.5495	8.4686	5.3437	6	8	10		0.549501		0.533984	8	10	8.2196	4.8068
2017	1045	1349	0.56349	8.2824	5.1086	6	8	10		0.563492		0.549211	8	10	8.28753	5.01367
2018	962	1297	0.57415	8.35	4.691	6	8	10		0.574148		0.56238	8	10	8.367	5.04777
yob	nunscored	nscored	propscores	mean	sd	25pc	50pc	75pc		prop scored		prop	med	75pc	mean	sd
1990	3329	389	0.10463	7.7198	8.3086	5	7	8		0.104626
1991	3184	468	0.12815	9.6325	11.783	5	7	8		0.128149
1992	2912	772	0.20955	11.977	11.925	6	8	13		0.209555		0.147443	7.33333	9.66667	9.77643	10.6722
1993	2667	1139	0.29926	12.832	10.756	7	10	14		0.299264		0.212323	8.33333	11.6667	11.4805	11.488
1994	2908	1587	0.35306	13.051	10.402	8	10	14		0.353059		0.287293	9.33333	13.6667	12.62	11.0277
1995	2791	2015	0.41927	12.955	9.7966	8	11	14		0.419268		0.357197	10.3333	14	12.946	10.3182
1996	2832	2314	0.44967	12.852	9.1175	8	11	14		0.44967		0.407332	10.6667	14	12.9527	9.77203
1997	2655	2561	0.49099	12.581	9.1123	8	11	14		0.490989		0.453309	11	14	12.796	9.34213
1998	2519	2641	0.51182	12.168	7.8218	8	11	13		0.511822		0.48416	11	13.6667	12.5337	8.68387
1999	2282	2630	0.53542	12.033	8.0383	8	10	13		0.535423		0.512745	10.6667	13.3333	12.2607	8.32413
2000	2289	2624	0.53409	12.009	7.8404	8	10	13		0.534093		0.527113	10.3333	13	12.07	7.90017
2001	2267	2767	0.54966	11.336	7.1159	8	10	13		0.549662		0.539726	10	13	11.7927	7.66487
2002	2471	2953	0.54443	11.569	8.3653	8	10	13		0.544432		0.542729	10	13	11.638	7.77387
2003	2713	3397	0.55597	11.15	7.2122	8	10	12		0.555974		0.550023	10	12.6667	11.3517	7.56447
2004	2911	3655	0.55666	11.12	7.4506	8	10	12		0.556655		0.552354	10	12.3333	11.2797	7.67603
2005	2949	3723	0.558	10.883	7.1925	8	10	12		0.558004		0.556878	10	12	11.051	7.2851
2006	2873	3761	0.56693	10.727	6.7118	7	10	12		0.566928		0.560529	10	12	10.91	7.1183
2007	2840	3719	0.56701	10.387	6.7293	7	9	12		0.567007		0.56398	9.66667	12	10.6657	6.87787
2008	2914	3538	0.54836	10.069	5.9788	7	9	12		0.548357		0.560764	9.33333	12	10.3943	6.4733
2009	2766	3337	0.54678	9.9298	6.2157	7	9	11		0.54678		0.554048	9	11.6667	10.1286	6.30793
2010	2831	3557	0.55683	9.7277	6.0349	7	9	11		0.556825		0.550654	9	11.3333	9.90883	6.07647
2011	2628	3202	0.54923	9.4863	5.823	7	9	11		0.549228		0.550945	9	11	9.7146	6.02453
2012	2460	2870	0.53846	9.3145	5.4947	7	9	11		0.538462		0.548172	9	11	9.5095	5.7842
2013	2390	2789	0.53852	9.2608	5.1892	7	9	11		0.538521		0.54207	9	11	9.35387	5.5023
2014	2286	2710	0.54243	9.2297	5.5197	7	9	11		0.542434		0.539805	9	11	9.26833	5.4012
2015	2215	2671	0.54666	9.3895	5.5819	7	9	11		0.546664		0.54254	9	11	9.29333	5.43027
2016	2148	2742	0.56074	9.2587	5.4458	7	9	11		0.560736		0.549945	9	11	9.29263	5.5158
2017	2201	2871	0.56605	9.3597	5.6652	7	9	11		0.566049		0.557816	9	11	9.33597	5.5643
2018	2122	2944	0.58113	9.3363	5.4439	7	9	11		0.581129		0.569305	9	11	9.31823	5.5183

## Sheet: GR
yob	nunscored	nscored	propscores	mean	sd	25pc	50pc	75pc		prop scored		prop	med	75pc	mean	sd
1990	755	78	0.093637	8.3462	7.0413	6	7	8		0.0936375
1991	710	110	0.13415	10.873	8.9955	6	8	12		0.134146
1992	596	166	0.21785	13.277	10.379	7	10	16		0.217848		0.148544	8.33333	12	10.8321	8.80527
1993	552	236	0.29949	14.178	10.905	8	12	16		0.299492		0.217162	10	14.6667	12.776	10.0932
1994	497	292	0.37009	14.555	10.91	8	12	16		0.370089		0.29581	11.3333	16	14.0033	10.7313
1995	452	354	0.43921	13.551	8.2756	9	12	16		0.439206		0.369596	12	16	14.0947	10.0302
1996	426	439	0.50751	13.795	8.0316	9	12	16		0.507514		0.438936	12	16	13.967	9.0724
1997	350	464	0.57002	14.006	8.606	9.5	12	16		0.570025		0.505582	12	16	13.784	8.3044
1998	319	477	0.59925	13.134	6.5529	10	12	15		0.599246		0.558928	12	15.6667	13.645	7.73017
1999	237	501	0.67886	13.433	7.3804	9.75	12	15		0.678862		0.616044	12	15.3333	13.5243	7.5131
2000	200	476	0.70414	13.048	6.4203	10	12	15		0.704142		0.66075	12	15	13.205	6.78453
2001	197	447	0.6941	12.698	6.1411	9	12	14		0.694099		0.692368	12	14.6667	13.0597	6.64727
2002	180	455	0.71654	12.268	5.5239	9	11	14		0.716535		0.704926	11.6667	14.3333	12.6713	6.02843
2003	199	441	0.68906	12.17	5.4444	9	11	14		0.689063		0.699899	11.3333	14	12.3787	5.70313
2004	180	471	0.7235	12.011	5.1758	9	11	14		0.723502		0.7097	11	14	12.1497	5.38137
2005	188	438	0.69968	11.984	6.2108	8	11	13		0.699681		0.704082	11	13.6667	12.055	5.61033
2006	182	424	0.69967	11.861	6.544	8	11	13		0.69967		0.707618	11	13.3333	11.952	5.97687
2007	186	432	0.69903	11.785	5.6837	8	11	13		0.699029		0.69946	11	13	11.8767	6.14617
2008	161	416	0.72097	11.334	5.0593	8	10	13		0.720971		0.706557	10.6667	13	11.66	5.76233
2009	179	385	0.68262	11.112	4.8558	8	10	13		0.682624		0.700875	10.3333	13	11.4103	5.1996
2010	169	369	0.68587	11.371	4.9946	8	10	13		0.685874		0.696489	10	13	11.2723	4.9699
2011	167	400	0.70547	10.88	5.0739	8	10	12		0.705467		0.691322	10	12.6667	11.121	4.97477
2012	170	341	0.66732	10.66	4.426	8	10	12		0.667319		0.68622	10	12.3333	10.9703	4.8315
2013	158	350	0.68898	10.891	6.2167	8	10	12		0.688976		0.687254	10	12	10.8103	5.23887
2014	165	312	0.65409	10.413	3.9513	8	10	12		0.654088		0.670128	10	12	10.6547	4.86467
2015	143	344	0.70637	10.855	6.4539	8	10	12		0.706366		0.683143	10	12	10.7197	5.54063
2016	167	329	0.66331	10.529	4.9859	8	10	12		0.663306		0.674587	10	12	10.599	5.13037
2017	158	345	0.68588	10.675	4.4302	8	10	12		0.685885		0.685186	10	12	10.6863	5.29
2018	117	330	0.73826	10.373	3.6434	8	10	12		0.738255		0.695815	10	12	10.5257	4.35317
yob	nunscored	nscored	propscores	mean	sd	25pc	50pc	75pc		prop scored		prop	med	75pc	mean	sd
1990	2055	180	0.080537	8.2944	7.4674	6	8	8		0.0805369
1991	2003	256	0.11332	10.641	9.6233	7	8	11		0.113324
1992	1590	502	0.23996	14.572	12.158	8	11	17		0.239962		0.144608	9	12	11.1691	9.74957
1993	1390	749	0.35016	15.577	11.189	8	13	18		0.350164		0.234483	10.6667	15.3333	13.5967	10.9901
1994	1201	926	0.43535	15.468	10.444	9	13	18		0.435355		0.341827	12.3333	17.6667	15.2057	11.2637
1995	1126	1161	0.50765	15.595	9.597	10	13	19		0.507652		0.431057	13	18.3333	15.5467	10.41
1996	1051	1360	0.56408	15.932	9.8805	10	13	19		0.564081		0.502363	13	18.6667	15.665	9.97383
1997	836	1413	0.62828	15.04	8.6601	10	12	17		0.628279		0.566671	12.6667	18.3333	15.5223	9.3792
1998	681	1396	0.67212	15.125	8.7365	10	12	17		0.672123		0.621495	12.3333	17.6667	15.3657	9.09237
1999	554	1264	0.69527	14.4	7.9468	10	12	16		0.69527		0.665224	12	16.6667	14.855	8.4478
2000	479	1262	0.72487	14.119	7.5603	10	12	16		0.724871		0.697421	12	16.3333	14.548	8.0812
2001	426	1102	0.7212	13.793	7.2305	10	12	15		0.721204		0.713781	12	15.6667	14.104	7.5792
2002	413	1176	0.74009	13.773	7.5385	9	12	15		0.740088		0.728721	12	15.3333	13.895	7.4431
2003	416	1158	0.73571	13.558	6.7347	9	12	15		0.735705		0.732333	12	15	13.708	7.1679
2004	423	1122	0.72621	13.523	6.7987	9	12	15		0.726214		0.734002	12	15	13.618	7.02397
2005	389	1094	0.73769	13.489	6.8589	9	12	15		0.737694		0.733204	12	15	13.5233	6.79743
2006	357	1046	0.74555	13.274	7.0595	9	12	15		0.745545		0.736484	12	15	13.4287	6.9057
2007	368	1092	0.74795	13.244	6.7528	9	11	15		0.747945		0.743728	11.6667	15	13.3357	6.8904
2008	328	973	0.74789	12.893	6.9318	9	11	14		0.747886		0.747126	11.3333	14.6667	13.137	6.9147
2009	329	910	0.73446	12.704	6.6963	9	11	14		0.734463		0.743432	11	14.3333	12.947	6.79363
2010	317	908	0.74122	12.512	6.59	9	11	14		0.741224		0.741191	11	14	12.703	6.73937
2011	308	923	0.7498	12.478	6.523	9	11	14		0.749797		0.741828	11	14	12.5647	6.6031
2012	318	811	0.71833	12.352	6.5974	9	11	14		0.718335		0.736452	11	14	12.4473	6.57013
2013	290	810	0.73636	12.079	6.3493	8	11	13		0.736364		0.734832	11	13.6667	12.303	6.4899
2014	320	782	0.70962	12.176	6.3149	9	11	14		0.709619		0.721439	11	13.6667	12.2023	6.42053
2015	296	823	0.73548	12.214	6.627	9	11	14		0.735478		0.727154	11	13.6667	12.1563	6.4304
2016	317	797	0.71544	12.145	6.0771	9	11	14		0.71544		0.720179	11	14	12.1783	6.33967
2017	321	878	0.73228	12.096	5.8719	9	11	14		0.732277		0.727732	11	14	12.1517	6.192
2018	276	820	0.74818	12.302	6.3139	9	11	14		0.748175		0.731964	11	14	12.181	6.08763

## Sheet: GSD
yob	nunscored	nscored	propscores	mean	sd	25pc	50pc	75pc		prop scored		prop	med	75pc	mean	sd
1990	1562	52	0.032218	8.7692	12.368	4	6	8		0.0322181
1991	1357	109	0.074352	11.037	11.102	5	8	14		0.074352
1992	1249	234	0.15779	12.868	11.64	6	10	15		0.157788		0.0881194	8	12.3333	10.8914	11.7033
1993	1240	339	0.21469	13.991	12.287	7	11	15.75		0.214693		0.148944	9.66667	14.9167	12.632	11.6763
1994	1227	453	0.26964	14.483	12.328	8	11	16		0.269643		0.214041	10.6667	15.5833	13.7807	12.085
1995	1207	585	0.32645	13.757	10.453	8	11	15		0.326451		0.270262	11	15.5833	14.077	11.6893
1996	1233	674	0.35343	13.889	11.175	8	11	15		0.353435		0.316509	11	15.3333	14.043	11.3187
1997	1166	710	0.37846	13.53	10.583	8	11	15		0.378465		0.352783	11	15	13.7253	10.737
1998	1042	642	0.38124	13.218	9.1067	9	11	15		0.381235		0.371045	11	15	13.5457	10.2882
1999	956	595	0.38362	13.081	8.5039	9	11	14		0.383623		0.381108	11	14.6667	13.2763	9.39787
2000	867	563	0.39371	12.54	8.2376	8	11	14		0.393706		0.386188	11	14.3333	12.9463	8.61607
2001	741	529	0.41654	12.594	8.9351	8	11	14		0.416535		0.397955	11	14	12.7383	8.55887
2002	705	490	0.41004	12.406	9.0206	8	10	13		0.410042		0.406761	10.6667	13.6667	12.5133	8.7311
2003	741	495	0.40049	12.214	8.19	9	10	13		0.400485		0.409021	10.3333	13.3333	12.4047	8.71523
2004	731	494	0.40327	12.508	9.1005	9	10	13		0.403265		0.404598	10	13	12.376	8.77037
2005	699	445	0.38899	12.811	8.7336	9	11	14		0.388986		0.397579	10.3333	13.3333	12.511	8.6747
2006	705	453	0.39119	12.177	7.9698	8	10	13		0.391192		0.394481	10.3333	13.3333	12.4987	8.6013
2007	646	450	0.41058	11.562	7.4135	8	10	12		0.410584		0.396921	10.3333	13	12.1833	8.03897
2008	592	441	0.42691	11.381	7.3503	8	10	12		0.426912		0.409563	10	12.3333	11.7067	7.57787
2009	535	409	0.43326	11.829	8.0553	8	10	12		0.433263		0.423586	10	12	11.5907	7.60637
2010	511	427	0.45522	11.499	7.3339	8	10	12		0.455224		0.438466	10	12	11.5697	7.57983
2011	482	375	0.43757	11.48	7.221	8	10	13		0.437573		0.44202	10	12.3333	11.6027	7.53673
2012	434	358	0.45202	10.855	5.3459	8	10	12		0.45202		0.448272	10	12.3333	11.278	6.6336
2013	439	342	0.4379	10.883	5.0543	8	10	13		0.4379		0.442498	10	12.6667	11.0727	5.87373
2014	395	322	0.44909	10.72	5.1787	8	10	12		0.449093		0.446338	10	12.3333	10.8193	5.19297
2015	417	309	0.42562	11.534	6.1741	8	10	13		0.42562		0.437538	10	12.6667	11.0457	5.46903
2016	404	297	0.42368	10.845	5.1547	8	10	12		0.42368		0.432798	10	12.3333	11.033	5.5025
2017	393	289	0.42375	11.066	5.8505	8	10	12		0.423754		0.424351	10	12.3333	11.1483	5.72643
2018	297	264	0.47059	10.996	6.2517	8	10	12		0.470588		0.439341	10	12	10.969	5.7523
yob	nunscored	nscored	propscores	mean	sd	25pc	50pc	75pc		prop scored		prop	med	75pc	mean	sd
1990	2836	60	0.020718	13.233	18.429	5.5	8	12		0.0207182
1991	2637	171	0.060897	14.327	16.511	6	8	13.75		0.0608974
1992	2349	389	0.14207	15.437	14	8	11	17		0.142075		0.0745634	9	14.25	14.3323	16.3133
1993	2351	731	0.23718	15.347	12.749	8	12	17		0.237184		0.146719	10.3333	15.9167	15.037	14.42
1994	2409	1022	0.29787	15.327	11.038	9	12	18		0.297872		0.22571	11.6667	17.3333	15.3703	12.5957
1995	2374	1296	0.35313	15.406	12.056	9	12	16.5		0.353134		0.296063	12	17.1667	15.36	11.9477
1996	2366	1475	0.38401	15.131	10.728	9	12	17		0.384015		0.345007	12	17.1667	15.288	11.274
1997	2118	1479	0.41118	15.584	11.279	10	12	17		0.411176		0.382775	12	16.8333	15.3737	11.3543
1998	1823	1308	0.41776	14.5	9.684	10	12	16		0.417758		0.404316	12	16.6667	15.0717	10.5637
1999	1635	1125	0.40761	14.614	9.798	10	12	16		0.407609		0.412181	12	16.3333	14.8993	10.2537
2000	1525	1073	0.41301	14.312	9.3099	10	12	16		0.41301		0.412792	12	16	14.4753	9.5973
2001	1328	939	0.4142	14.7	10.149	9	12	16		0.414204		0.411607	12	16	14.542	9.7523
2002	1255	983	0.43923	14.364	10.006	10	12	15		0.439231		0.422148	12	15.6667	14.4587	9.82163
2003	1306	1019	0.43828	14.197	9.8903	9	12	15		0.43828		0.430572	12	15.3333	14.4203	10.0151
2004	1241	996	0.44524	13.982	9.5549	9	12	15		0.445239		0.440917	12	15	14.181	9.81707
2005	1141	939	0.45144	14.154	9.673	9	12	15		0.451442		0.444987	12	15	14.111	9.70607
2006	1134	908	0.44466	14.166	9.8772	9	12	15		0.444662		0.447115	12	15	14.1007	9.7017
2007	1059	880	0.45384	14.004	9.6999	9	12	15		0.453842		0.449982	12	15	14.108	9.75003
2008	974	883	0.4755	13.888	9.5216	9	12	15		0.475498		0.458001	12	15	14.0193	9.69957
2009	849	797	0.4842	13.879	9.5282	9	11	15		0.484204		0.471181	11.6667	15	13.9237	9.58323
2010	808	827	0.50581	13.702	9.5542	9	11	15		0.50581		0.488504	11.3333	15	13.823	9.53467
2011	742	816	0.52375	13.68	9.1957	9	11	15		0.523748		0.504588	11	15	13.7537	9.42603
2012	650	712	0.52276	14.009	9.8474	9	12	15		0.522761		0.51744	11.3333	15	13.797	9.53243
2013	621	695	0.52812	13.927	9.6413	9	12	15		0.528116		0.524875	11.6667	15	13.872	9.56147
2014	620	663	0.51676	13.882	9.2324	9	12	15		0.516758		0.522545	12	15	13.9393	9.5737
2015	647	653	0.50231	13.944	9.4065	9	12	15		0.502308		0.515727	12	15	13.9177	9.42673
2016	632	650	0.50702	13.863	9.3168	9	12	15		0.50702		0.508695	12	15	13.8963	9.31857
2017	611	597	0.49421	13.826	9.1627	9	12	15		0.494205		0.501178	12	15	13.8777	9.29533
2018	516	570	0.52486	13.851	9.24	9	12	15		0.524862		0.508696	12	15	13.8467	9.23983

## Sheet: Rott
yob	nunscored	nscored	propscores	mean	sd	25pc	50pc	75pc		prop scored		prop	med	75pc	mean	sd
1990	361	14	0.037333	7	7.5854	0	7	8		0.0373333
1991	281	30	0.096463	7.9667	7.6945	4	6	8		0.096463
1992	218	39	0.15175	8.8205	8.0127	4	8	10		0.151751		0.0951824	7	8.66667	7.92907	7.7642
1993	232	54	0.18881	10.87	9.6993	6	8	13		0.188811		0.145675	7.33333	10.3333	9.21907	8.46883
1994	228	82	0.26452	10.159	8.1611	6	8.5	12		0.264516		0.201693	8.16667	11.6667	9.94983	8.62437
1995	236	111	0.31988	9.045	6.6707	5.25	8	11		0.319885		0.257737	8.16667	12	10.0247	8.17703
1996	225	138	0.38017	8.7899	5.678	6	8	10		0.380165		0.321522	8.16667	11	9.3313	6.8366
1997	210	182	0.46429	8.9176	6.7569	6	8	10		0.464286		0.388112	8	10.3333	8.9175	6.36853
1998	246	202	0.45089	9.0446	6.2009	6	8	11		0.450893		0.431781	8	10.3333	8.91737	6.21193
1999	266	216	0.44813	8.5833	5.1726	6	8	10		0.448133		0.454437	8	10.3333	8.8485	6.04347
2000	244	213	0.46608	8.6291	5.4547	6	8	10		0.466083		0.455036	8	10.3333	8.75233	5.6094
2001	259	212	0.45011	8.5519	4.9779	6	8	10		0.450106		0.454774	8	10	8.5881	5.20173
2002	280	238	0.45946	8.6134	4.1095	6	8	10		0.459459		0.45855	8	10	8.59813	4.84737
2003	343	234	0.40555	8.6239	4.0875	6	8	10		0.405546		0.438371	8	10	8.5964	4.39163
2004	346	265	0.43372	8.9925	5.3992	6	8	10		0.433715		0.432907	8	10	8.74327	4.53207
2005	376	248	0.39744	9.0927	4.6151	6	8	11		0.397436		0.412232	8	10.3333	8.90303	4.7006
2006	350	247	0.41374	8.7409	4.0911	6	8	10		0.413735		0.414962	8	10.3333	8.94203	4.7018
2007	264	170	0.39171	8.9059	5.4807	6	8	10		0.391705		0.400959	8	10.3333	8.91317	4.72897
2008	184	125	0.40453	9.04	5.979	6	8	10		0.404531		0.403324	8	10	8.8956	5.1836
2009	146	97	0.39918	8.7113	5.1214	6	8	10		0.399177		0.398471	8	10	8.88573	5.52703
2010	130	111	0.46058	8.9099	7.2118	6	7	9		0.460581		0.42143	7.66667	9.66667	8.88707	6.10407
2011	134	92	0.40708	7.4891	3.4306	6	7	9		0.40708		0.422279	7.33333	9.33333	8.3701	5.2546
2012	111	82	0.42487	8.2561	5.0572	6	7	9		0.42487		0.430844	7	9	8.21837	5.2332
2013	101	80	0.44199	8	5.0089	6	7	9		0.441989		0.424646	7	9	7.91507	4.4989
2014	93	79	0.4593	6.9873	3.4213	6	7	8.75		0.459302		0.442054	7	8.91667	7.7478	4.4958
2015	95	80	0.45714	7.95	4.6847	6	7	9		0.457143		0.452811	7	8.91667	7.64577	4.37163
2016	92	68	0.425	7.3676	3.0999	6	7	9		0.425		0.447148	7	8.91667	7.43497	3.7353
2017	98	78	0.44318	7.1282	3.3434	6	6	9		0.443182		0.441775	6.66667	9	7.48193	3.70933
2018	73	87	0.54375	6.9195	3.6447	5	6	9		0.54375		0.470644	6.33333	9	7.13843	3.36267
yob	nunscored	nscored	propscores	mean	sd	25pc	50pc	75pc		prop scored		prop	med	75pc	mean	sd
1990	464	4	0.008547	6.5	1.7321	5	6.5	8		0.00854701
1991	363	30	0.076336	7.9	4.8874	5	7	9		0.0763359
1992	298	48	0.13873	9.3333	5.6242	6	8	10.5		0.138728		0.0745371	7.16667	9.16667	7.9111	4.08123
1993	310	88	0.22111	9.4318	6.1003	6	8	11		0.221106		0.14539	7.66667	10.1667	8.88837	5.5373
1994	308	156	0.33621	9.5256	5.3851	6	8	11		0.336207		0.232014	8	10.8333	9.43023	5.7032
1995	321	214	0.4	9.7897	5.8932	6	8	11		0.4		0.319104	8	11	9.58237	5.79287
1996	337	266	0.44113	10.023	6.3012	6	8	12		0.441128		0.392445	8	11.3333	9.77943	5.85983
1997	327	315	0.49065	10.841	6.7988	7	9	12		0.490654		0.443927	8.33333	11.6667	10.2179	6.33107
1998	386	345	0.47196	10.771	7.2085	7	9	12		0.471956		0.467913	8.66667	12	10.545	6.7695
1999	401	363	0.47513	10.554	7.0377	7	9	12		0.475131		0.479247	9	12	10.722	7.015
2000	403	348	0.46338	10.358	6.381	7	9	12		0.463382		0.470156	9	12	10.561	6.87573
2001	443	356	0.44556	9.8595	5.872	7	9	11		0.445557		0.461357	9	11.6667	10.2572	6.43023
2002	477	379	0.44276	10.179	5.6624	7	9	11.75		0.442757		0.450565	9	11.5833	10.1322	5.9718
2003	555	361	0.3941	9.591	5.5838	6	8	11		0.394105		0.427473	8.66667	11.25	9.8765	5.70607
2004	545	406	0.42692	10.123	6.5406	7	8	11		0.426919		0.42126	8.33333	11.25	9.96433	5.92893
2005	577	409	0.41481	10.22	6.6274	7	9	11		0.414807		0.411944	8.33333	11	9.978	6.2506
2006	511	394	0.43536	10.313	6.2923	7	9	12		0.435359		0.425695	8.66667	11.3333	10.2187	6.48677
2007	348	235	0.40309	10	6.1261	7	9	11		0.403087		0.417751	9	11.3333	10.1777	6.3486
2008	239	157	0.39646	9.9829	6.1131	7	9	11		0.396465		0.411637	9	11.3333	10.0986	6.17717
2009	166	166	0.5	9.7848	6.1403	7	9	11		0.5		0.433184	9	11	9.92257	6.1265
2010	164	145	0.46926	9.6137	6.1311	7	9	10		0.469256		0.45524	9	10.6667	9.7938	6.12817
2011	158	169	0.51682	9.4817	5.8011	6	8	10		0.51682		0.495358	8.66667	10.3333	9.62673	6.02417
2012	133	138	0.50923	9.2592	5.8172	6	8	10		0.509225		0.498433	8.33333	10	9.45153	5.91647
2013	142	124	0.46617	9.3252	5.869	6	8	10.25		0.466165		0.497403	8	10.0833	9.35537	5.8291
2014	124	140	0.5303	9.4279	6.1149	6	8	11		0.530303		0.501898	8	10.4167	9.33743	5.9337
2015	119	136	0.53333	9.3521	6.5842	6	8	10		0.533333		0.509934	8	10.4167	9.3684	6.18937
2016	127	127	0.5	9.4059	6.661	6	8	10		0.5		0.521212	8	10.3333	9.3953	6.45337
2017	138	142	0.50714	9.7506	6.5291	6	8	11		0.507143		0.513492	8	10.3333	9.50287	6.59143
2018	112	136	0.54839	9.5697	7.0004	6	8	10		0.548387		0.51851	8	10.3333	9.5754	6.73017

## Sheet: BMD
yob	nunscored	nscored	propscores	mean	sd	25pc	50pc	75pc		prop scored		prop	med	75pc	mean	sd
1990	75	3	0.038462	6.3333	2.0817	4.75	7	7.75		0.0384615
1991	59	10	0.14493	7.1	2.5582	6	7	8		0.144928
1992	60	20	0.25	11.5	12.726	5.5	8	11.5		0.25		0.144463	7.33333	9.08333	8.3111	5.78863
1993	37	33	0.47143	12.636	11.399	6	9	15		0.471429		0.288785	8	11.5	10.412	8.8944
1994	28	48	0.63158	12.875	10.187	7	10.5	15		0.631579		0.451003	9.16667	13.8333	12.337	11.4373
1995	30	52	0.63415	13.635	10.012	8	11	15.5		0.634146		0.579051	10.1667	15.1667	13.0487	10.5327
1996	18	47	0.72308	13.128	10.062	8	10	14.75		0.723077		0.662934	10.5	15.0833	13.2127	10.087
1997	14	62	0.81579	12.274	7.2906	7	10	15		0.815789		0.724338	10.3333	15.0833	13.0123	9.12153
1998	17	57	0.77027	13.211	7.8142	8	11	15.5		0.77027		0.769712	10.3333	15.0833	12.871	8.38893
1999	13	67	0.8375	11.418	5.5899	8	11	13		0.8375		0.807853	10.6667	14.5	12.301	6.89823
2000	12	73	0.85882	11.932	8.7072	7	10	13.25		0.858824		0.822198	10.6667	13.9167	12.187	7.37043
2001	16	53	0.76812	11.66	6.0826	7	10	14		0.768116		0.82148	10.3333	13.4167	11.67	6.79323
2002	17	59	0.77632	11.678	7.2217	7	10	14		0.776316		0.801085	10	13.75	11.7567	7.33717
2003	14	60	0.81081	11.317	6.4137	7	9.5	13		0.810811		0.785081	9.83333	13.6667	11.5517	6.57267
2004	27	71	0.72449	10.648	6.1947	7	9	12		0.72449		0.770539	9.5	13	11.2143	6.61003
2005	22	63	0.74118	10.492	6.0665	7	9	12.75		0.741176		0.758826	9.16667	12.5833	10.819	6.22497
2006	22	51	0.69863	9.7255	5.2233	6.25	8	11		0.69863		0.721432	8.66667	11.9167	10.2885	5.82817
2007	31	50	0.61728	10.06	7.4735	6	8	12		0.617284		0.685697	8.33333	11.9167	10.0925	6.25443
2008	27	56	0.6747	10.571	5.8956	7	9	12.5		0.674699		0.663538	8.33333	11.8333	10.1188	6.19747
2009	29	49	0.62821	11.082	6.1807	7	9	12.25		0.628205		0.640063	8.66667	12.25	10.571	6.5166
2010	38	46	0.54762	11.891	8.2684	7	9.5	14		0.547619		0.616841	9.16667	12.9167	11.1813	6.78157
2011	46	54	0.54	10.926	5.6564	8	9.5	12		0.54		0.571941	9.33333	12.75	11.2997	6.70183
2012	43	43	0.5	11.395	6.6553	8	10	12		0.5		0.529206	9.66667	12.6667	11.404	6.86003
2013	53	48	0.47525	10.5	6.9954	7	9	11.5		0.475248		0.505083	9.5	11.8333	10.9403	6.4357
2014	55	47	0.46078	8.5957	3.8088	6	8	10.75		0.460784		0.478677	9	11.4167	10.1636	5.81983
2015	51	40	0.43956	7.95	2.2865	6	8	10		0.43956		0.458531	8.33333	10.75	9.01523	4.36357
2016	63	46	0.42202	9.5217	6.7057	6	8	11		0.422018		0.440788	8	10.5833	8.68913	4.267
2017	53	42	0.44211	10.095	6.1716	6	9	12		0.442105		0.434561	8.33333	11	9.1889	5.0546
2018	27	43	0.61429	10.163	6.9417	6	9	11		0.614286		0.492803	8.66667	11.3333	9.92657	6.60633
yob	nunscored	nscored	propscores	mean	sd	25pc	50pc	75pc		prop scored		prop	med	75pc	mean	sd
1990	130	2	0.015152	7.5	0.70711	7	7.5	8		0.0151515
1991	105	16	0.13223	6.8125	2.8336	5.5	6.5	7		0.132231
1992	85	40	0.32	11.825	12.561	6	7	12.5		0.32		0.155794	7	9.16667	8.7125	5.36724
1993	64	58	0.47541	14.862	11.561	8	11	19		0.47541		0.309214	8.16667	12.8333	11.1665	8.9852
1994	46	83	0.64341	15.265	13.679	7	11	18.75		0.643411		0.479607	9.66667	16.75	13.984	12.6003
1995	40	122	0.75309	16.352	13.576	8	11	19		0.753086		0.623969	11	18.9167	15.493	12.9387
1996	18	103	0.85124	14.803	9.5577	9	11	18		0.85124		0.749246	11	18.5833	15.4733	12.2709
1997	16	142	0.89873	14.472	9.8785	9	11	17		0.898734		0.834353	11	18	15.209	11.0041
1998	29	127	0.8141	15.007	9.4204	9	12	18		0.814103		0.854692	11.3333	17.6667	14.7607	9.61887
1999	20	127	0.86395	13.521	8.813	8	11	15		0.863946		0.858927	11.3333	16.6667	14.3333	9.37063
2000	23	130	0.84967	13.606	8.8622	9	11	15		0.849673		0.842574	11.3333	16	14.0447	9.03187
2001	24	107	0.81679	13.739	9.8281	8	11	15		0.816794		0.843471	11	15	13.622	9.16777
2002	24	133	0.84713	14.451	11.415	8	11	17		0.847134		0.837867	11	15.6667	13.932	10.0351
2003	26	136	0.83951	13.261	9.3191	8	10	15		0.839506		0.834478	10.6667	15.6667	13.817	10.1874
2004	29	135	0.82317	12.162	7.8022	7	9.5	14		0.823171		0.836604	10.1667	15.3333	13.2913	9.5121
2005	30	134	0.81707	11.683	7.4912	7	9	13		0.817073		0.826583	9.5	14	12.3687	8.20417
2006	27	113	0.80714	12.556	8.6044	7	10	13		0.807143		0.815796	9.5	13.3333	12.1337	7.96593
2007	39	103	0.72535	11.782	7.148	7	10	13		0.725352		0.783189	9.66667	13	12.007	7.74787
2008	37	107	0.74306	12.155	7.1472	8	10	13		0.743056		0.758517	10	13	12.1643	7.6332
2009	45	106	0.70199	11.296	6.312	7	10	13		0.701987		0.723465	10	13	11.7443	6.86907
2010	48	90	0.65217	11.148	6.2193	7	10	13		0.652174		0.699072	10	13	11.533	6.5595
2011	61	105	0.63253	11.81	7.8442	8	10	13		0.63253		0.66223	10	13	11.418	6.79183
2012	56	74	0.56923	12.063	7.4996	8	10	13		0.569231		0.617978	10	13	11.6737	7.1877
2013	77	81	0.51266	11.169	6.1367	7	10	13		0.512658		0.571473	10	13	11.6807	7.16017
2014	79	77	0.49359	11.535	6.9941	7	10	13		0.49359		0.52516	10	13	11.589	6.8768
2015	59	66	0.528	11.761	6.8208	7	10	13		0.528		0.511416	10	13	11.4883	6.65053
2016	84	77	0.47826	11.028	6.0576	7	10	13		0.478261		0.49995	10	13	11.4413	6.62417
2017	66	61	0.48031	11.268	6.0891	7	10	13		0.480315		0.495525	10	13	11.3523	6.3225
2018	40	74	0.64912	11.232	6.0514	7	10	13		0.649123		0.5359	10	13	11.176	6.06603

## Sheet: Newf
yob	nunscored	nscored	propscores	mean	sd	25pc	50pc	75pc		prop scored		prop	med	75pc	mean	sd
1990	61	1	0.016129	13	0	13	13	13		0.016129
1991	64	8	0.11111	28.75	36.503	7.5	10.5	48.5		0.111111
1992	51	15	0.22727	22.733	22.581	6.25	13	40.25		0.227273		0.118171	12.1667	33.9167	21.4943	19.6947
1993	36	21	0.36842	14.905	15.01	5.75	10	18		0.368421		0.235602	11.1667	35.5833	22.1293	24.698
1994	39	29	0.42647	17.034	14.829	7	13	23.25		0.426471		0.340721	12	27.1667	18.224	17.4733
1995	33	35	0.51471	17.371	16.5	8.25	13	19.5		0.514706		0.436533	12	20.25	16.4367	15.4463
1996	39	39	0.5	17.128	13.959	9	13	18.75		0.5		0.480392	13	20.5	17.1777	15.096
1997	27	50	0.64935	17.66	13.201	8	13	23		0.649351		0.554686	13	20.4167	17.3863	14.5533
1998	35	44	0.55696	19.091	13.923	10	13	24.5		0.556962		0.568771	13	22.0833	17.9597	13.6943
1999	31	52	0.62651	19.538	16.358	9.5	13	22.5		0.626506		0.61094	13	23.3333	18.763	14.494
2000	25	59	0.70238	21.881	17.807	10	16	24.75		0.702381		0.628616	14	23.9167	20.17	16.0293
2001	27	54	0.66667	17.315	13.32	9	13	20		0.666667		0.665185	14	22.4167	19.578	15.8283
2002	37	58	0.61053	17.862	11.923	9	13.5	22		0.610526		0.659858	14.1667	22.25	19.0193	14.35
2003	30	43	0.58904	17.93	13.909	8	14	20		0.589041		0.622078	13.5	20.6667	17.7023	13.0507
2004	42	57	0.57576	16.737	11.925	8.75	13	21.75		0.575758		0.591775	13.5	21.25	17.5097	12.5857
2005	36	65	0.64356	17.231	12.924	8	13	23.25		0.643564		0.602788	13.3333	21.6667	17.2993	12.9193
2006	41	60	0.59406	15.783	10.78	8	12.5	21.5		0.594059		0.60446	12.8333	22.1667	16.5837	11.8763
2007	38	62	0.62	17.032	14.602	8	11.5	21		0.62		0.619208	12.3333	21.9167	16.682	12.7687
2008	46	64	0.58182	16.469	12.105	8.5	12.5	20		0.581818		0.598626	12.1667	20.8333	16.428	12.4957
2009	43	52	0.54737	13.615	10.676	7.5	10	16		0.547368		0.583062	11.3333	19	15.7053	12.461
2010	45	55	0.55	13.673	9.5025	8	11	16		0.55		0.559729	11.1667	17.3333	14.5857	10.7612
2011	46	53	0.53535	15.377	11.558	8	13	17		0.535354		0.544241	11.3333	16.3333	14.2217	10.5788
2012	53	49	0.48039	12.204	8.4656	7.75	10	13.25		0.480392		0.521915	11.3333	15.4167	13.7513	9.84203
2013	62	55	0.47009	13.873	14.209	8	10	13		0.470085		0.495277	11	14.4167	13.818	11.4109
2014	60	56	0.48276	11.018	5.324	7.5	10	12.5		0.482759		0.477745	10	12.9167	12.365	9.33287
2015	55	50	0.47619	10.42	5.621	8	10	12		0.47619		0.476345	10	12.5	11.7703	8.38467
2016	60	49	0.44954	10.939	5.0679	8	10	13		0.449541		0.469497	10	12.5	10.7923	5.33763
2017	45	40	0.47059	10.825	6.7819	8	10	12		0.470588		0.46544	10	12.3333	10.728	5.8236
2018	25	40	0.61538	10.975	5.929	7.5	9.5	12		0.615385		0.511838	9.83333	12.3333	10.913	5.92627
yob	nunscored	nscored	propscores	mean	sd	25pc	50pc	75pc		prop scored		prop	med	75pc	mean	sd
1990	94	0	0	NaN	NaN	NaN	NaN	NaN		0
1991	98	5	0.048544	7	2	5.75	6	8.5		0.0485437
1992	81	26	0.24299	22.923	21.403	7	15.5	30		0.242991		0.0971781	10.75	19.25	14.9615	11.7015
1993	55	33	0.375	22.061	19.221	9.5	15	29.25		0.375		0.222178	12.1667	22.5833	17.328	14.208
1994	76	59	0.43704	27.153	17.928	14	24	36.75		0.437037		0.351676	18.1667	32	24.0457	19.5173
1995	56	71	0.55906	24.31	15.523	12.5	21	32.75		0.559055		0.457031	20	32.9167	24.508	17.5573
1996	52	99	0.65563	24.778	18.125	12	19	34.75		0.655629		0.550574	21.3333	34.75	25.4137	17.192
1997	45	110	0.70968	20.355	16.725	9	15	26		0.709677		0.641454	18.3333	31.1667	23.1477	16.791
1998	46	111	0.70701	22.387	17.042	10	16	31		0.707006		0.690771	16.6667	30.5833	22.5067	17.2973
1999	40	98	0.71014	22.748	18.6	9.25	15	28		0.710145		0.708943	15.3333	28.3333	21.83	17.4557
2000	38	124	0.76543	18.879	15.622	8.5	14	26		0.765432		0.727528	15	28.3333	21.338	17.088
2001	32	109	0.77305	20.669	17.34	9	14	26		0.77305		0.749542	14.3333	26.6667	20.7653	17.1873
2002	39	117	0.75	16.935	12.5	8	13	21.5		0.75		0.762827	13.6667	24.5	18.8277	15.154
2003	38	114	0.75	17.694	13.273	9	13	22		0.75		0.757683	13.3333	23.1667	18.4327	14.371
2004	49	118	0.70659	17.258	12.851	9	12	22.5		0.706587		0.735529	12.6667	22	17.2957	12.8747
2005	48	135	0.7377	15.896	12.597	8	11	19.75		0.737705		0.731431	12	21.4167	16.9493	12.907
2006	60	125	0.67568	16.244	11.787	8	12	21		0.675676		0.706656	11.6667	21.0833	16.466	12.4117
2007	49	126	0.72	15.585	12.997	8	10	18		0.72		0.711127	11	19.5833	15.9083	12.4603
2008	60	127	0.67914	14.837	12.357	8	10	15		0.679144		0.691607	10.6667	18	15.5553	12.3803
2009	57	109	0.65663	15.563	12.898	8	11	19		0.656627		0.685257	10.3333	17.3333	15.3283	12.7507
2010	53	125	0.70225	16.548	14.964	8	11	18.75		0.702247		0.679339	10.6667	17.5833	15.6493	13.4063
2011	56	120	0.68182	14.674	11.394	8	11	17.5		0.681818		0.680231	11	18.4167	15.595	13.0853
2012	65	99	0.60366	14.948	11.846	8	11	15.75		0.603659		0.662575	11	17.3333	15.39	12.7347
2013	79	114	0.59067	16.348	13.469	8	11	18.75		0.590674		0.625383	11	17.3333	15.3233	12.2363
2014	75	107	0.58791	14.281	13.458	8	10	14		0.587912		0.594081	10.6667	16.1667	15.1923	12.9243
2015	76	92	0.54762	14.252	13.004	7	11	15		0.547619		0.575402	10.6667	15.9167	14.9603	13.3103
2016	77	94	0.54971	13.104	11.78	7	9	14		0.549708		0.561746	10	14.3333	13.879	12.7473
2017	48	85	0.6391	13.252	10.915	7	10	14		0.639098		0.578808	10	14.3333	13.536	11.8997
2018	34	82	0.7069	12.919	10.388	8	10	13		0.706897		0.631901	9.66667	13.6667	13.0917	11.0277
