# Supplementary material for: Effectiveness of Canine Hip Dysplasia and Elbow Dysplasia Improvement Programs in Six UK Pedigree Breeds
Source: Front Vet Sci. 2020 Jan 15;6:490. doi: 10.3389/fvets.2019.00490 (PMC6974481; doi:10.3389/fvets.2019.00490)
Supplement: Supplementary Table 3 — Elbow grade statistics of individuals born per year by breed. [file Table_3.XLSX]

## Sheet: LR
yob	nborn	nscored	0	1	2	3	4	5	6	mean	median	mode	sd		Prop Scored		EBVs
1998	34992	188	147	11	14	9	5	2	0	0.51064	0	0	1.1066		0.00537266		8.6353
1999	33885	208	166	14	13	6	2	4	3	0.5	0	0	1.2198		0.00613841		8.2183
2000	33091	238	204	13	8	8	4	1	0	0.31092	0	0	0.8787		0.00719229		7.9818
2001	34079	287	241	12	17	10	4	1	2	0.37979	0	0	1.0063		0.00842161		7.4445
2002	36585	379	316	24	21	9	5	2	2	0.3562	0	0	0.95246		0.0103594		7.4296
2003	41771	532	455	30	23	13	7	0	4	0.31391	0	0	0.91295		0.0127361		6.5366
2004	45273	661	569	31	29	15	10	3	4	0.32224	0	0	0.94738		0.0146003		6.5426
2005	45732	803	681	43	41	15	15	4	4	0.34122	0	0	0.95569		0.0175588		5.8671
2006	46002	971	835	46	40	26	13	6	5	0.32544	0	0	0.94986		0.0211078		5.0769
2007	45383	1108	956	59	38	26	17	8	4	0.31137	0	0	0.92812		0.0244144		4.7319
2008	44485	1310	1142	66	57	20	7	7	11	0.28168	0	0	0.89693		0.0294481		4.2678
2009	41528	1425	1198	103	72	27	17	6	2	0.30737	0	0	0.83522		0.0343142		3.8294
2010	43446	1739	1479	99	84	35	25	5	12	0.3272	0	0	0.93544		0.0400267		2.8995
2011	39498	1738	1499	79	72	44	29	8	7	0.31818	0	0	0.93022		0.0440022		2.4133
2012	36347	1752	1514	91	81	31	18	5	12	0.29395	0	0	0.89021		0.0482021		0.8329
2013	35128	1934	1682	99	82	33	20	7	11	0.28077	0	0	0.86984		0.0550558		0.49117
2014	34142	2181	1930	101	84	28	18	11	9	0.24484	0	0	0.81422		0.0638803		-0.65714
2015	33235	2208	1958	92	94	39	13	5	7	0.2337	0	0	0.76257		0.066436		-1.075
2016	33765	2063	1846	90	76	29	10	7	5	0.21037	0	0	0.72328		0.0610988		-2.4016
2017	35702	1613	1442	60	66	31	6	3	5	0.21947	0	0	0.7373		0.0451795		-2.917
2018	36048	123	115	1	2	3	2	0	0	0.17886	0	0	0.72465		0.00341212		-4.4829

## Sheet: GR
yob	nborn	nscored	0	1	2	3	4	5	6	mean	median	mode	sd		Prop Scored		EBVs
1998	14220	135	104	13	8	4	3	1	2	0.51852	0	0	1.1898		0.00949367		2.3987
1999	12615	78	61	4	7	4	0	1	1	0.52564	0	0	1.1813		0.00618312		2.4791
2000	11837	93	70	9	7	4	2	0	1	0.52688	0	0	1.1189		0.00785672		1.0614
2001	10083	89	65	7	10	3	3	1	0	0.59551	0	0	1.1453		0.00882674		0.74858
2002	10529	131	103	11	6	7	3	1	0	0.46565	0	0	1.0473		0.0124418		0.65081
2003	10601	181	139	12	14	8	6	1	1	0.54696	0	0	1.1615		0.0170739		-0.10809
2004	10531	155	129	7	11	2	4	2	0	0.39355	0	0	1.0161		0.0147185		-0.97929
2005	10105	198	161	13	12	5	5	1	1	0.41919	0	0	1.0379		0.0195943		0.41336
2006	9284	203	156	18	12	6	9	0	2	0.53202	0	0	1.1743		0.0218656		-0.30425
2007	9858	263	217	14	20	6	2	3	1	0.38403	0	0	0.98114		0.0266788		-0.25798
2008	8721	281	209	27	15	22	6	1	1	0.56228	0	0	1.1231		0.0322211		0.13919
2009	8112	305	245	19	18	11	8	3	1	0.4623	0	0	1.094		0.0375986		-0.051668
2010	7857	377	276	40	33	19	7	0	2	0.53846	0	0	1.054		0.0479827		0.96023
2011	8042	451	355	34	28	22	9	1	2	0.46341	0	0	1.0415		0.0560806		-0.054788
2012	7201	433	333	34	37	14	10	3	2	0.50115	0	0	1.0825		0.0601305		1.377
2013	7155	494	381	44	38	20	7	3	1	0.46356	0	0	0.99984		0.0690426		0.44507
2014	7050	567	441	42	49	19	13	1	2	0.46914	0	0	1.0203		0.0804255		1.9493
2015	7263	632	508	50	37	20	15	2	0	0.4019	0	0	0.94703		0.0870164		-0.13189
2016	7188	507	416	30	30	16	11	2	2	0.40237	0	0	1.0039		0.0705342		-1.3493
2017	8102	393	328	21	21	15	7	1	0	0.35878	0	0	0.91252		0.0485065		-0.87816
2018	7719	27	20	2	1	3	1	0	0	0.62963	0	0	1.2136		0.00349786		-1.6805

## Sheet: GSD
yob	nborn	nscored	0	1	2	3	4	5	6	mean	median	mode	sd		Prop Scored		EBVs
1998	20462	14	11	1	0	0	1	0	1	0.78571	0	0	1.8472		0.000684195		8.9956
1999	17816	17	12	2	2	1	0	0	0	0.52941	0	0	0.94324		0.000954198		8.863
2000	16271	22	18	2	1	0	1	0	0	0.36364	0	0	0.95346		0.0013521		8.3036
2001	14195	17	14	0	1	0	1	0	1	0.70588	0	0	1.7235		0.0011976		9.1583
2002	14159	30	25	1	1	1	2	0	0	0.46667	0	0	1.1666		0.00211879		9.0621
2003	14598	66	57	2	2	4	0	1	0	0.34848	0	0	0.98438		0.00452117		7.6274
2004	13789	82	72	3	2	1	1	1	2	0.37805	0	0	1.2236		0.00594677		6.5583
2005	13146	158	123	16	6	6	3	1	3	0.51266	0	0	1.2195		0.0120189		6.1531
2006	12649	204	165	17	11	2	3	1	5	0.45098	0	0	1.1963		0.0161278		5.0716
2007	12013	238	196	15	15	8	2	0	2	0.37395	0	0	0.95846		0.0198119		4.7707
2008	11671	358	279	31	18	18	6	2	4	0.5	0	0	1.1419		0.0306743		3.8045
2009	10244	424	364	18	21	9	7	4	1	0.33255	0	0	0.95292		0.0413901		3.2771
2010	10117	476	392	30	32	11	3	1	7	0.39076	0	0	1.0355		0.0470495		2.6536
2011	9795	524	427	37	21	23	12	2	2	0.41603	0	0	1.0267		0.0534967		1.4754
2012	8346	480	381	29	31	20	14	4	1	0.48542	0	0	1.1003		0.0575126		0.58563
2013	7945	465	387	27	25	18	6	1	1	0.35699	0	0	0.91296		0.0585274		0.084998
2014	7898	587	477	34	33	23	10	4	6	0.45145	0	0	1.1156		0.0743226		-0.94931
2015	7941	524	428	24	38	15	12	1	6	0.44656	0	0	1.1058		0.0659867		-1.9049
2016	7673	430	349	31	22	14	10	0	4	0.42093	0	0	1.0498		0.0560407		-2.2883
2017	7432	281	237	13	17	6	5	0	3	0.36655	0	0	1.0093		0.0378095		-2.3998
2018	6965	12	10	0	1	1	0	0	0	0.41667	0	0	0.9962		0.0017229		-3.025

## Sheet: ROTT
yob	nborn	nscored	0	1	2	3	4	5	6	mean	median	mode	sd		Prop Scored		EBVs
1998	5159	9	1	2	4	2	0	0	0	1.7778	2	2	0.97183		0.00174452		12.276
1999	5300	14	4	2	4	0	4	0	0	1.8571	2	0	1.6104		0.00264151		11.246
2000	5029	12	7	1	0	1	3	0	0	1.3333	0	0	1.8257		0.00238616		10.801
2001	5609	9	5	0	2	1	1	0	0	1.2222	0	0	1.5635		0.00160456		10.486
2002	5861	26	10	4	2	5	4	1	0	1.6923	1	0	1.6916		0.0044361		10.508
2003	6411	45	23	6	7	3	5	1	0	1.2	0	0	1.5166		0.00701919		9.8259
2004	6757	71	33	11	12	7	7	1	0	1.2535	1	0	1.4513		0.0105076		9.5207
2005	6880	75	43	5	11	9	6	1	0	1.1067	0	0	1.4665		0.0109012		8.7878
2006	6253	71	31	12	14	4	7	2	1	1.3521	1	0	1.5684		0.0113545		8.2332
2007	3971	69	28	12	13	6	8	1	1	1.4348	1	0	1.5575		0.017376		8.11
2008	2533	72	41	7	10	4	8	2	0	1.125	0	0	1.5468		0.0284248		7.5023
2009	2141	103	52	14	14	8	14	0	1	1.2427	0	0	1.5433		0.0481084		5.0016
2010	1860	81	25	15	27	8	6	0	0	1.4444	2	2	1.2349		0.0435484		5.666
2011	2017	118	51	14	31	11	8	2	1	1.3305	1	0	1.4385		0.0585027		2.0384
2012	1532	89	43	13	14	12	6	1	0	1.191	1	0	1.397		0.058094		3.2062
2013	1462	125	64	15	24	11	9	1	1	1.144	0	0	1.4239		0.0854993		0.48212
2014	1573	130	62	16	22	16	10	2	2	1.3077	1	0	1.5444		0.0826446		-0.93331
2015	1448	136	81	17	17	11	10	0	0	0.91176	0	0	1.3079		0.0939227		-3.8301
2016	1493	125	79	6	19	14	4	2	1	0.944	0	0	1.4102		0.083724		-3.2546
2017	1700	81	46	15	9	5	5	0	1	0.91358	0	0	1.3435		0.0476471		-4.9343
2018	1626	4	4	0	0	0	0	0	0	0	0	0	0		0.00246002		-6.4649

## Sheet: BMD
yob	nborn	nscored	0	1	2	3	4	5	6	mean	median	mode	sd		Prop Scored		EBVs
1998	824	116	59	11	13	11	9	7	6	1.5259	0	0	1.9268		0.140777		19.649
1999	822	104	54	9	15	8	11	2	5	1.4135	0	0	1.8148		0.126521		17.964
2000	807	129	79	7	9	8	15	2	9	1.3411	0	0	1.9705		0.159851		16.095
2001	650	122	77	7	15	5	8	4	6	1.1475	0	0	1.8076		0.187692		12.073
2002	828	159	100	12	13	11	13	4	6	1.1258	0	0	1.7529		0.192029		11.713
2003	869	150	94	11	15	12	7	5	6	1.1067	0	0	1.7346		0.172612		9.2457
2004	814	153	93	12	18	11	9	2	8	1.1438	0	0	1.7488		0.187961		11.676
2005	821	142	105	11	9	8	2	2	5	0.71127	0	0	1.4808		0.17296		4.9301
2006	734	134	94	7	12	10	4	3	4	0.86567	0	0	1.5694		0.182561		8.3034
2007	660	119	72	13	15	7	4	3	5	1.0504	0	0	1.6563		0.180303		8.8531
2008	688	115	68	13	12	8	8	1	5	1.113	0	0	1.6846		0.167151		5.4801
2009	737	132	85	12	7	9	12	2	5	1.0682	0	0	1.7307		0.179104		5.1505
2010	624	106	63	13	9	7	8	4	2	1.0943	0	0	1.6477		0.169872		4.4836
2011	728	144	86	15	16	5	10	5	7	1.1736	0	0	1.7987		0.197802		3.411
2012	498	95	62	6	9	5	8	2	3	1.0421	0	0	1.6943		0.190763		1.1667
2013	740	134	85	17	6	12	9	2	3	0.96269	0	0	1.5676		0.181081		1.1131
2014	658	117	75	9	12	8	6	2	5	1.0342	0	0	1.6863		0.177812		-0.92723
2015	489	99	65	13	7	6	5	0	3	0.83838	0	0	1.4757		0.202454		-4.741
2016	654	98	77	8	5	6	2	0	0	0.44898	0	0	0.9857		0.149847		-4.5522
2017	528	59	46	2	5	3	1	1	1	0.61017	0	0	1.3393		0.111742		-2.7341
2018	551	1	0	0	0	0	1	0	0	4	4	4	0		0.00181488		-5.0692

## Sheet: NEWF
yob	nborn	nscored	0	1	2	3	4	5	6	mean	median	mode	sd		Prop Scored		EBVs
1998	1056	12	9	1	1	1	0	0	0	0.5	0	0	1		0.0113636		3.572
1999	872	16	12	1	1	0	1	0	1	0.8125	0	0	1.7595		0.0183486		2.336
2000	1095	9	6	0	1	0	0	2	0	1.3333	0	0	2.1794		0.00821918		2.9006
2001	898	7	6	0	0	1	0	0	0	0.42857	0	0	1.1339		0.0077951		0.17477
2002	964	16	10	1	3	1	1	0	0	0.875	0	0	1.3102		0.0165975		-0.36637
2003	975	20	13	1	2	1	0	1	2	1.25	0	0	2.0995		0.0205128		-0.67184
2004	931	22	16	1	2	1	1	1	0	0.77273	0	0	1.4778		0.0236305		1.6988
2005	1056	36	28	0	3	3	0	0	2	0.75	0	0	1.6102		0.0340909		1.4265
2006	1117	27	20	2	3	0	1	1	0	0.62963	0	0	1.3053		0.0241719		-1.2603
2007	997	60	45	3	2	2	2	2	4	0.91667	0	0	1.8621		0.0601805		-0.56288
2008	1078	75	49	4	12	4	4	2	0	0.88	0	0	1.3946		0.0695733		-0.70953
2009	883	74	56	3	7	3	3	1	1	0.66216	0	0	1.3576		0.0838052		-1.6836
2010	1019	110	83	16	4	2	2	1	2	0.5	0	0	1.1789		0.107949		0.92022
2011	910	112	80	10	15	3	2	2	0	0.59821	0	0	1.1187		0.123077		0.3029
2012	873	111	76	10	11	5	5	2	2	0.8018	0	0	1.4449		0.127148		-1.0546
2013	981	103	71	9	9	6	6	0	2	0.78641	0	0	1.4118		0.104995		-0.13286
2014	950	129	93	11	11	3	8	2	1	0.69767	0	0	1.3498		0.135789		-0.83069
2015	871	85	67	6	6	2	2	2	0	0.49412	0	0	1.1404		0.097589		-0.26716
2016	863	60	43	5	5	2	2	1	2	0.76667	0	0	1.5223		0.0695249		1.5865
2017	746	43	27	4	5	5	1	1	0	0.88372	0	0	1.3489		0.0576408		1.3269
2018	672	2	1	1	0	0	0	0	0	0.5	0.5	0	0.70711		0.00297619		0.88966
