# Supplementary material for: Effectiveness of Canine Hip Dysplasia and Elbow Dysplasia Improvement Programs in Six UK Pedigree Breeds
Source: Front Vet Sci. 2020 Jan 15;6:490. doi: 10.3389/fvets.2019.00490 (PMC6974481; doi:10.3389/fvets.2019.00490)
Supplement: Supplementary Table 4 — Elbow grade statistics of sires and dams of dogs born per year by breed. [file Table_4.XLSX]

## Sheet: LR
Dam				grade
yob	nunscored	nscored	propscores	0	1	2	3	4	5	6
1998	5133	27	0.0052326	22	2	1	1	0	0	1
1999	4856	56	0.011401	47	3	2	2	1	0	1
2000	4824	89	0.018115	72	5	8	3	0	1	0
2001	4906	128	0.025427	107	7	9	3	1	1	0
2002	5271	153	0.028208	129	7	8	6	2	0	1
2003	5923	187	0.030606	163	12	4	5	0	1	2
2004	6316	250	0.038075	214	13	11	8	1	1	2
2005	6375	297	0.044514	261	12	10	8	3	0	3
2006	6216	418	0.063009	385	12	9	8	1	1	2
2007	6073	486	0.074097	442	17	12	12	2	1	0
2008	5836	616	0.095474	552	25	25	9	2	2	1
2009	5387	716	0.11732	645	31	18	14	5	3	0
2010	5457	931	0.14574	840	48	23	15	5	0	0
2011	4828	1002	0.17187	903	50	34	10	4	1	0
2012	4181	1149	0.21557	1021	57	46	14	11	0	0
2013	3929	1250	0.24136	1116	68	44	9	7	4	2
2014	3595	1401	0.28042	1256	71	50	12	10	1	1
2015	3347	1539	0.31498	1404	73	46	8	8	0	0
2016	3108	1782	0.36442	1624	71	63	11	6	4	3
2017	3106	1966	0.38762	1809	77	58	13	6	0	3
2018	2853	2213	0.43683	2032	89	65	16	7	2	2
Sire
yob	nunscored	nscored	propscores	0	1	2	3	4	5	6
1998	2521	13	0.0051302	10	1	1	0	0	0	1
1999	2392	33	0.013608	26	3	2	1	1	0	0
2000	2294	60	0.025489	49	4	3	3	1	0	0
2001	2369	75	0.030687	60	6	3	4	1	1	0
2002	2468	100	0.038941	83	8	2	4	2	1	0
2003	2660	142	0.050678	120	8	6	5	3	0	0
2004	2750	161	0.055307	145	7	3	5	1	0	0
2005	2909	209	0.06703	182	14	5	7	1	0	0
2006	2915	250	0.078989	216	15	7	5	4	0	3
2007	2982	314	0.095267	267	19	14	5	6	0	3
2008	2933	380	0.1147	329	23	17	3	5	0	3
2009	2733	477	0.1486	410	28	24	5	6	1	3
2010	2732	566	0.17162	492	35	23	6	5	1	4
2011	2507	603	0.19389	533	36	19	5	6	2	2
2012	2260	678	0.23077	617	25	22	6	5	1	2
2013	2084	741	0.2623	679	30	25	2	2	2	1
2014	1789	766	0.2998	702	38	19	1	3	2	1
2015	1663	834	0.334	768	34	22	1	5	3	1
2016	1504	900	0.37438	836	35	19	3	3	1	3
2017	1406	988	0.4127	916	36	26	6	2	1	1
2018	1248	1011	0.44754	937	35	34	2	2	1	0

## Sheet: GR
Dam				grade
yob	nunscored	nscored	propscores	0	1	2	3	4	5	6
1998	2067	10	0.0048146	7	1	1	0	1	0	0
1999	1790	28	0.015402	15	5	5	1	2	0	0
2000	1689	52	0.029868	37	7	5	1	0	1	1
2001	1467	61	0.039921	51	7	2	0	0	0	1
2002	1520	69	0.043424	52	9	3	3	1	0	1
2003	1482	92	0.05845	71	5	11	2	1	0	2
2004	1458	87	0.056311	69	8	9	4	1	0	1
2005	1377	106	0.071477	81	8	8	6	2	0	1
2006	1290	113	0.080542	94	7	7	3	1	0	1
2007	1324	136	0.093151	111	9	9	3	3	0	1
2008	1160	141	0.10838	112	12	8	7	2	0	0
2009	1078	161	0.12994	137	11	8	2	3	0	0
2010	1017	208	0.1698	181	14	6	4	3	0	0
2011	999	232	0.18846	192	14	17	5	4	0	0
2012	888	241	0.21346	204	13	14	6	2	1	1
2013	780	320	0.29091	261	27	21	8	3	0	0
2014	756	346	0.31397	285	29	15	13	4	0	0
2015	709	410	0.3664	341	32	22	9	4	2	0
2016	654	460	0.41293	381	36	29	9	5	0	0
2017	664	535	0.44621	424	44	50	7	7	3	0
2018	534	562	0.51277	470	32	45	7	7	1	0
Sire
yob	nunscored	nscored	propscores	0	1	2	3	4	5	6
1998	782	14	0.017588	11	0	1	1	0	1	0
1999	710	28	0.03794	24	1	1	1	0	1	0
2000	640	36	0.053254	31	2	1	1	1	0	0
2001	603	41	0.063665	33	2	4	2	0	0	0
2002	587	48	0.075591	40	1	4	1	2	0	0
2003	583	57	0.089063	50	2	4	0	1	0	0
2004	580	71	0.10906	62	3	2	2	2	0	0
2005	550	76	0.12141	64	4	3	2	3	0	0
2006	523	83	0.13696	71	7	2	2	1	0	0
2007	522	96	0.15534	83	6	4	2	1	0	0
2008	474	103	0.17851	87	8	3	3	2	0	0
2009	443	121	0.21454	104	7	6	4	0	0	0
2010	401	137	0.25465	115	14	4	4	0	0	0
2011	402	165	0.29101	144	10	5	5	1	0	0
2012	358	153	0.29941	132	13	3	5	0	0	0
2013	330	178	0.35039	147	18	6	5	2	0	0
2014	295	182	0.38155	154	16	7	5	0	0	0
2015	265	222	0.45585	190	18	8	5	0	1	0
2016	277	219	0.44153	192	15	7	5	0	0	0
2017	265	238	0.47316	210	14	8	6	0	0	0
2018	201	246	0.55034	218	14	8	4	2	0	0

## Sheet: GSD
Dam				grade
yob	nunscored	nscored	propscores	0	1	2	3	4	5	6
1998	3127	4	0.0012775	3	1	0	0	0	0	0
1999	2755	5	0.0018116	4	1	0	0	0	0	0
2000	2594	4	0.0015396	5	0	0	0	0	0	0
2001	2259	8	0.0035289	3	1	1	1	2	0	0
2002	2223	15	0.0067024	12	0	1	0	2	0	0
2003	2309	16	0.0068817	12	1	1	1	1	0	0
2004	2221	16	0.0071524	14	1	0	0	1	0	0
2005	2055	25	0.012019	19	2	1	1	2	0	0
2006	1997	45	0.022037	39	4	1	1	0	0	0
2007	1880	59	0.030428	55	3	0	1	0	0	0
2008	1754	103	0.055466	91	5	3	1	2	0	1
2009	1525	121	0.073512	103	11	2	3	1	0	1
2010	1441	194	0.11865	164	19	7	1	2	0	1
2011	1321	237	0.15212	208	14	8	2	3	0	2
2012	1080	282	0.20705	246	18	14	2	1	0	1
2013	970	346	0.26292	299	25	13	4	4	0	1
2014	911	372	0.28995	327	21	17	5	2	0	0
2015	892	408	0.31385	349	24	24	4	7	0	0
2016	802	480	0.37441	415	31	23	8	3	0	0
2017	740	468	0.38742	421	22	24	8	3	0	2
2018	619	467	0.43002	416	34	18	6	5	0	1
Sire
yob	nunscored	nscored	propscores	0	1	2	3	4	5	6
1998	1682	2	0.0011876	1	0	0	0	1	0	0
1999	1545	6	0.0038685	4	1	0	0	1	0	0
2000	1425	5	0.0034965	4	0	0	0	1	0	0
2001	1264	6	0.0047244	6	0	0	0	0	0	0
2002	1189	6	0.0050209	6	0	0	0	0	0	0
2003	1229	7	0.0056634	7	0	0	0	0	0	0
2004	1212	13	0.010612	11	1	1	0	0	0	0
2005	1125	19	0.016608	18	1	0	0	0	0	0
2006	1129	29	0.025043	26	1	1	0	1	0	0
2007	1051	45	0.041058	38	2	2	0	1	1	1
2008	958	75	0.072604	63	3	5	2	1	0	1
2009	845	99	0.10487	78	8	6	2	3	0	2
2010	806	132	0.14072	107	10	8	2	4	0	1
2011	710	147	0.17153	124	11	7	0	3	0	2
2012	631	161	0.20328	139	10	7	3	1	0	1
2013	603	178	0.22791	153	10	8	4	1	1	1
2014	525	192	0.26778	165	10	10	5	0	2	0
2015	522	204	0.28099	179	8	10	5	1	1	0
2016	486	215	0.3067	188	8	11	5	2	1	0
2017	457	225	0.32991	196	11	10	3	3	2	0
2018	343	218	0.38859	184	15	12	4	3	0	0

## Sheet: ROTT
Dam				grade
yob	nunscored	nscored	propscores	0	1	2	3	4	5	6
1998	731	0	0	0	0	0	0	0	0	0
1999	762	2	0.0026178	2	0	0	0	0	0	0
2000	748	3	0.0039947	2	0	1	0	0	0	0
2001	795	4	0.0050063	2	1	1	0	0	0	0
2002	850	6	0.0070093	3	0	2	0	1	0	0
2003	907	9	0.0098253	5	1	1	1	1	0	0
2004	936	15	0.015773	9	1	2	3	0	0	0
2005	972	14	0.014199	10	2	1	1	1	0	0
2006	882	23	0.025414	10	6	3	3	1	0	0
2007	554	29	0.049743	16	0	7	4	2	0	0
2008	370	26	0.065657	12	2	8	3	2	2	0
2009	299	33	0.099398	14	3	8	6	2	0	0
2010	272	37	0.11974	15	5	6	5	5	1	0
2011	271	56	0.17125	34	8	9	4	1	0	0
2012	216	55	0.20295	30	7	6	4	9	0	0
2013	209	57	0.21429	34	3	9	1	10	0	0
2014	204	60	0.22727	32	7	10	6	5	0	0
2015	172	83	0.32549	39	13	24	6	1	0	0
2016	179	75	0.29528	45	15	14	7	2	0	0
2017	177	103	0.36786	56	9	23	12	3	0	0
2018	147	101	0.40726	57	11	21	8	5	1	0
Sire
yob	nunscored	nscored	propscores	0	1	2	3	4	5	6
1998	448	0	0	0	0	0	0	0	0	0
1999	481	1	0.0020747	0	0	0	0	1	0	0
2000	452	5	0.010941	2	0	2	0	1	0	0
2001	466	5	0.010616	0	1	2	1	1	0	0
2002	511	7	0.013514	2	0	3	0	2	0	0
2003	572	5	0.0086655	1	0	2	1	1	0	0
2004	599	12	0.01964	1	3	5	1	2	0	0
2005	613	11	0.017628	3	2	3	1	2	0	0
2006	573	24	0.040201	10	6	4	2	2	0	0
2007	411	23	0.052995	10	5	3	3	2	0	0
2008	282	27	0.087379	10	6	7	2	2	0	0
2009	212	31	0.12757	13	9	4	1	4	0	0
2010	210	31	0.12863	15	6	5	1	4	0	0
2011	198	28	0.12389	15	4	8	0	1	0	0
2012	158	35	0.18135	17	5	7	4	2	0	0
2013	142	39	0.21547	19	8	5	3	4	0	0
2014	129	43	0.25	23	8	7	2	3	0	0
2015	126	49	0.28	24	9	10	4	2	0	0
2016	115	45	0.28125	17	6	13	4	4	1	0
2017	120	56	0.31818	25	9	12	5	4	1	0
2018	92	68	0.425	34	10	13	7	3	0	1

## Sheet: BMD
Dam				grade
yob	nunscored	nscored	propscores	0	1	2	3	4	5	6
1998	151	5	0.032051	0	2	1	1	1	0	0
1999	119	28	0.19048	17	2	5	1	2	0	1
2000	84	69	0.45098	39	5	9	2	11	2	1
2001	68	63	0.48092	48	5	5	4	5	2	0
2002	74	83	0.52866	51	7	13	2	8	0	2
2003	63	99	0.61111	70	9	6	7	5	2	0
2004	65	99	0.60366	64	4	16	4	9	1	1
2005	65	99	0.60366	72	7	10	3	4	1	2
2006	39	101	0.72143	66	11	11	6	5	1	1
2007	55	87	0.61268	71	10	12	4	2	1	1
2008	51	93	0.64583	74	6	12	6	1	1	1
2009	60	91	0.60265	68	6	15	7	3	0	2
2010	53	85	0.61594	65	11	16	4	5	0	0
2011	67	99	0.59639	64	11	14	9	0	1	2
2012	62	68	0.52308	58	14	18	7	1	1	2
2013	81	77	0.48734	57	16	13	8	4	0	3
2014	83	73	0.46795	54	21	13	6	6	0	1
2015	61	64	0.512	66	15	12	4	3	0	1
2016	85	76	0.47205	60	18	10	9	3	0	1
2017	67	60	0.47244	60	17	14	5	3	0	2
2018	40	74	0.64912	66	17	9	7	1	0	1
Sire
yob	nunscored	nscored	propscores	0	1	2	3	4	5	6
1998	69	5	0.067568	1	1	3	0	0	0	0
1999	64	16	0.2	9	2	2	0	3	0	0
2000	51	34	0.4	22	4	4	1	1	0	2
2001	46	23	0.33333	16	2	2	0	3	0	0
2002	39	37	0.48684	23	3	5	0	4	1	1
2003	35	39	0.52703	29	2	2	0	6	0	0
2004	44	54	0.55102	37	2	7	3	4	1	0
2005	35	50	0.58824	40	1	3	1	4	1	0
2006	30	43	0.58904	34	2	1	3	3	0	0
2007	37	44	0.54321	36	3	1	2	2	0	0
2008	30	53	0.63855	45	4	0	4	0	0	0
2009	31	47	0.60256	43	2	1	1	0	0	0
2010	41	43	0.5119	39	2	1	0	1	0	0
2011	48	52	0.52	46	3	3	0	0	0	0
2012	44	42	0.48837	37	0	3	2	0	0	0
2013	54	47	0.46535	41	3	2	1	0	0	0
2014	56	46	0.45098	39	2	4	0	0	0	1
2015	52	39	0.42857	31	4	4	0	0	0	0
2016	64	45	0.41284	37	4	2	0	0	0	2
2017	55	40	0.42105	33	4	0	1	0	0	2
2018	28	42	0.6	35	3	2	0	0	0	2

## Sheet: NWF
Dam				grade
yob	nunscored	nscored	propscores	0	1	2	3	4	5	6
1998	156	1	0.0063694	1	0	0	0	0	0	0
1999	136	2	0.014493	2	0	0	0	0	0	0
2000	160	2	0.012346	1	0	1	0	0	0	0
2001	135	6	0.042553	5	0	1	0	0	0	0
2002	148	8	0.051282	5	1	1	1	0	0	0
2003	148	4	0.026316	6	1	1	0	0	0	0
2004	162	5	0.02994	5	2	1	0	0	0	0
2005	175	8	0.043716	6	0	1	0	1	0	0
2006	177	8	0.043243	8	0	0	0	0	0	0
2007	160	15	0.085714	12	0	2	1	0	0	0
2008	175	12	0.064171	12	0	2	1	0	0	0
2009	146	20	0.12048	18	1	1	0	0	0	0
2010	143	35	0.19663	30	1	2	2	0	0	0
2011	140	36	0.20455	26	0	6	1	2	1	0
2012	115	49	0.29878	37	3	5	2	1	1	0
2013	127	66	0.34197	46	7	10	1	2	0	0
2014	102	80	0.43956	66	5	5	2	1	0	1
2015	94	74	0.44048	63	4	9	2	1	0	1
2016	86	85	0.49708	66	8	6	2	2	1	0
2017	58	75	0.56391	64	12	7	0	2	0	0
2018	44	72	0.62069	66	12	5	1	1	0	0
Sire
yob	nunscored	nscored	propscores	0	1	2	3	4	5	6
1998	78	1	0.012658	1	0	0	0	0	0	0
1999	82	1	0.012048	1	0	0	0	0	0	0
2000	83	1	0.011905	0	0	1	0	0	0	0
2001	79	2	0.024691	1	0	1	0	0	0	0
2002	92	3	0.031579	1	1	1	0	0	0	0
2003	71	2	0.027397	0	1	1	0	0	0	0
2004	96	3	0.030303	2	0	0	1	0	0	0
2005	95	6	0.059406	2	1	1	0	1	1	0
2006	94	7	0.069307	4	0	1	1	1	0	0
2007	92	8	0.08	6	0	1	1	0	0	0
2008	98	12	0.10909	7	1	2	1	0	0	1
2009	84	11	0.11579	6	1	1	1	1	0	1
2010	73	27	0.27	18	1	2	3	2	0	1
2011	71	28	0.28283	21	1	2	3	0	0	1
2012	71	31	0.30392	22	4	4	1	0	0	0
2013	82	35	0.29915	27	4	3	1	0	0	0
2014	71	45	0.38793	30	5	3	3	2	1	1
2015	62	43	0.40952	26	8	4	2	2	1	0
2016	63	46	0.42202	26	8	5	2	4	1	0
2017	49	36	0.42353	25	6	3	0	2	0	0
2018	29	36	0.55385	24	6	4	1	1	0	0
